# Supplementary material
Source: PubMed Central journal article supplement (PMC6624811)
Supplement: jamaophthalmol-137-1107-s002.pdf [file jamaophthalmol-137-1107-s002.pdf]

## Supplementary Online Content

Husain R, Do T, Lai J, et al. Efficacy of phacoemulsification alone vs phacoemulsification with goniosynechialysis in patients with primary angle-closure disease: a randomized clinical trial. *JAMA Ophthalmol*. Published online July 11, 2019. doi:10.1001/jamaophthalmol.2019.2493

**eMethods.** Detailed Methods

**eTable 1.** Cox Regression Analysis for Predictors of Failure

**eTable 2.** Baseline Patient Characteristics for Singapore and Vietnam Subjects Who Underwent Phacoemulsification Alone

This supplementary material has been provided by the authors to give readers additional information about their work.

## **eMethods. Detailed Methods**

### *Inclusion and exclusion criteria*

The inclusion criteria were:

1. Age  $\geq$  30 years
2. Diagnosis of PACD.
3. More than or equal to 90 degrees of PAS (not necessarily contiguous) .
4. IOP  $>$ 21 mmHg if untreated or  $\leq$  21 mmHg on topical medication
5. Lens opacity deemed sufficient to be causing decreased vision in the opinion of the operating surgeon.
6. Written informed consent

The exclusion criteria were:

1. Previous intraocular surgery (except laser iridotomy was allowed)
2. Previous eye trauma
3. For patients on warfarin, INR  $>$ 3.0 on day of surgery
4. Evidence of moderate non-proliferative diabetic retinopathy, neovascularization, or rubeosis iridis
5. Chronic use of topical or systemic steroids
6. Only eye (visual acuity worse than 6/60 Snellen in non-study eye)
7. Advanced glaucoma with severe visual field (VF) defect, defined as visual field deficit threatening fixation.

All subjects underwent baseline and subsequent follow-up evaluation in a standardized manner that included an assessment of visual acuity using a logarithm of minimum angle of resolution chart (Lighthouse Inc., Long Island, NY, USA), slitlamp examination, stereoscopic evaluation of the optic disc, visual fields (Humphrey Visual Field Analyser, Carl-Zeiss Meditec, Dublin, CA, USA) and IOP measurement with Goldmann applanation tonometry (Haag-Streit, Koniz, Switzerland). Gonioscopy was performed by an experienced examiner in the dark using a Goldmann 2-mirror lens at  $\times$  16 magnification. Indentation

gonioscopy was carried out using a Sussman 4-mirror lens (Ocular Instruments Inc., Bellevue, WA, USA) to establish the presence and degree of PAS. Depending on availability at the different sites, some subjects also underwent anterior-segment optical coherence tomography (AS-OCT, Carl-Zeiss Meditec, Dublin, CA, USA) and corneal specular microscopy (Topcon SP-200P, Newbury, UK).

| <b>eTable 1: Cox regression analysis for predictors of failure<br/>(defined as intraocular pressure (IOP) &gt;21mmHg and a decrease in IOP of &lt; 20% of<br/>baseline IOP)</b>  |                                     |                |
|----------------------------------------------------------------------------------------------------------------------------------------------------------------------------------|-------------------------------------|----------------|
|                                                                                                                                                                                  | <b>HR (95% confidence interval)</b> | <b>p-value</b> |
| <b>Group</b>                                                                                                                                                                     |                                     |                |
| PEI                                                                                                                                                                              | Reference                           | 0.83           |
| PEI-GSL                                                                                                                                                                          | 0.93 (0.48, 1.80)                   |                |
| <b>Sites</b>                                                                                                                                                                     |                                     |                |
| Singapore                                                                                                                                                                        | Reference                           |                |
| Thailand                                                                                                                                                                         | 0.90 (0.32, 2.55)                   | 0.84           |
| Hong Kong                                                                                                                                                                        | 0.77 (0.21, 2.88)                   | 0.69           |
| Vietnam                                                                                                                                                                          | 0.42 (0.15, 1.21)                   | 0.11           |
| <b>Diagnosis</b>                                                                                                                                                                 |                                     |                |
| PAC                                                                                                                                                                              | Reference                           |                |
| PACG                                                                                                                                                                             | 1.21 (0.59, 2.50)                   | 0.61           |
| Baseline intraocular pressure                                                                                                                                                    | 0.93 (0.87, 0.99)                   | 0.02           |
| Baseline PAS                                                                                                                                                                     | 1.01 (0.87, 1.16)                   | 0.91           |
| PEI: Phacoemulsification; PEI-GSL: Phacoemulsification- goniosynechialysis; PAC: primary angle closure; PACG: primary angle closure glaucoma; PAS: peripheral anterior synechiae |                                     |                |

| <b>Table 2: Baseline patient characteristics for Singapore and Vietnam subjects who underwent phacoemulsification alone</b>                                               |                  |                |                                                  |
|---------------------------------------------------------------------------------------------------------------------------------------------------------------------------|------------------|----------------|--------------------------------------------------|
|                                                                                                                                                                           | <b>Singapore</b> | <b>Vietnam</b> | <b>Mean difference (95% confidence interval)</b> |
| Number of eyes                                                                                                                                                            | 15               | 15             |                                                  |
| Mean Age (SD)                                                                                                                                                             | 67.3±6.8         | 69.3±10.1      | -1.9 (-8.4, 4.5)                                 |
| Males: Females                                                                                                                                                            | 4:11             | 4:11           |                                                  |
| Mean BCVA (LogMar)                                                                                                                                                        | 0.34±0.24        | 0.62±0.22      | -0.28 (-0.52, -0.04)                             |
| Baseline IOP mm Hg                                                                                                                                                        | 18.0±7.8         | 27.4±3.7       | -9.4 (-13.9, -5.0)                               |
| Number of medications                                                                                                                                                     | 2.2±0.86         | 2.0±0.0        | 0.2 (-0.3, 0.7)                                  |
| Mean Shaffer                                                                                                                                                              | 1.28±0.57        | 0.53±0.63      | 0.75 (0.30, 1.19)                                |
| PAS (Clock Hours)                                                                                                                                                         | 5.9±2.31         | 7.3±2.8        | -1.4 (-3.3, 0.54)                                |
| PAC:PACG                                                                                                                                                                  | 9:6              | 0:15           |                                                  |
| Axial length                                                                                                                                                              | 23.04 ± 1.03     | 22.47 ± 0.76   | 0.57 (-0.12, 1.26)                               |
| Anterior chamber depth                                                                                                                                                    | 2.42±0.30        | 1.85±0.13      | 0.56 (0.39, 0.74)                                |
| Central corneal thickness                                                                                                                                                 | 538.6±39.3       | 528.3±44.5     | 10.3 (-25.3, 45.8)                               |
| Endothelial cell count cells/mm <sup>2</sup>                                                                                                                              | 2502.4±296.9     | 2480.0±258.3   | 22.4 (-204.9, 249.6)                             |
| Mean Deviation                                                                                                                                                            | - 11.5±7.5       | - 12.9±7.1     | 1.45 (-6.2, 9.0)                                 |
| SD-Standard deviation; BCVA – Best corrected visual acuity; PAC/PACG – Primary angle closure/ PAC glaucoma; IOP- Intraocular pressure; PAS- Peripheral anterior synechiae |                  |                |                                                  |
