# Supplementary material
Source: PubMed Central journal article supplement (PMC6624811)
Supplement: jamaophthalmol-137-1107-s003.pdf [file jamaophthalmol-137-1107-s003.pdf]

## **Data Sharing Statement**

Husain. Phacoemulsification Alone Compared With Phacoemulsification With Goniosynechialysis in Patients With Primary Angle Closure Disease. *JAMA Ophthalmol*. Published July 11, 2019. 10.1001/jamaophthalmol.2019.2493

### **Data**

**Data available:** No
